# Supplementary material
Source: PubMed Central journal article supplement (PMC3461919)
Supplement: JCI63937sd.pdf [file JCI63937sd.pdf]

## Supplemental Figure 1 :

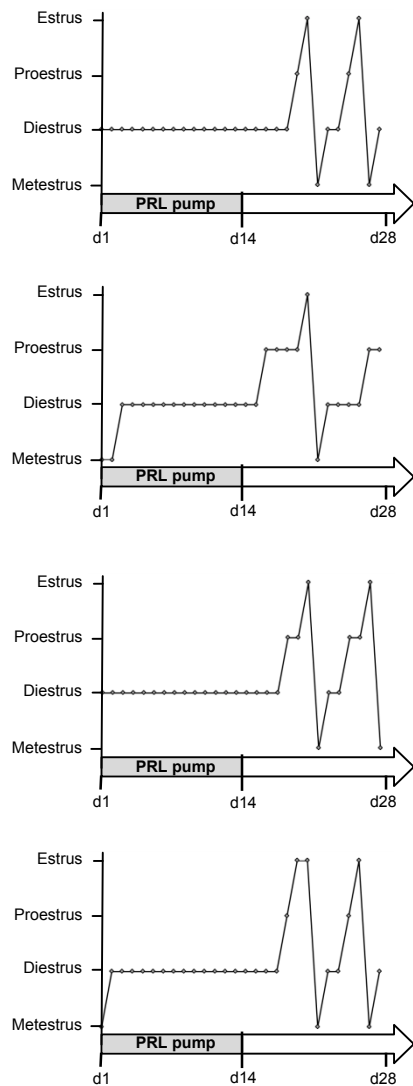

**Suppl. Figure 1: Representative cycling profiles of four mice with pumps delivering PRL only for 14 days.** Mice showed a resumption of cyclicity after 14 days of PRL treatment (grey boxes) demonstrating the reversibility of the gonadotrophic deficiency.

## Supplemental Figure 2 :

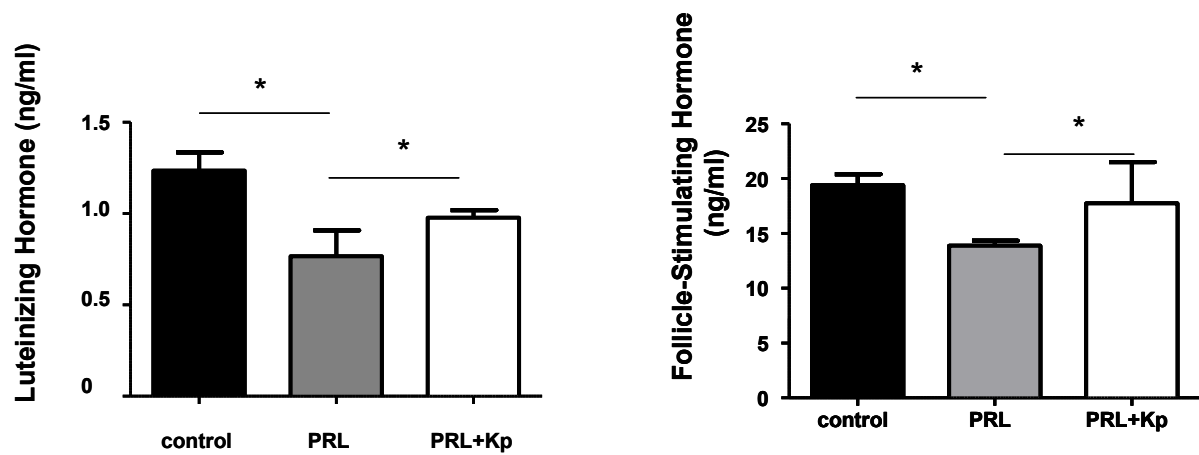

**Suppl. Figure 2: Hormone levels in control, PRL and PRL+Kp mice.** Five to twelve mice were used in each assay group. P values are provided for statistically significant differences; all P values were calculated with nonparametric Kruskal Wallis and post test Dunn's multiple comparison tests.

## Supplemental Figure 3 :

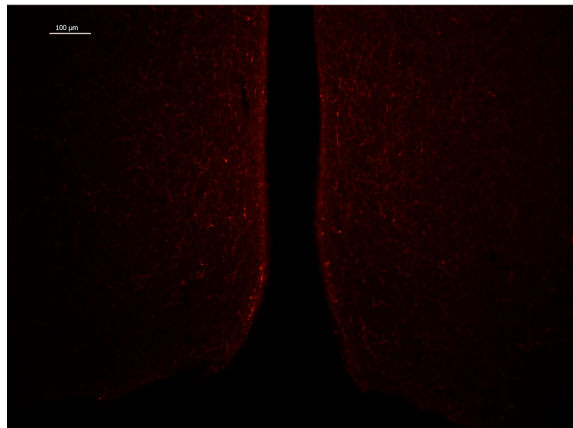

**Control AVPV**

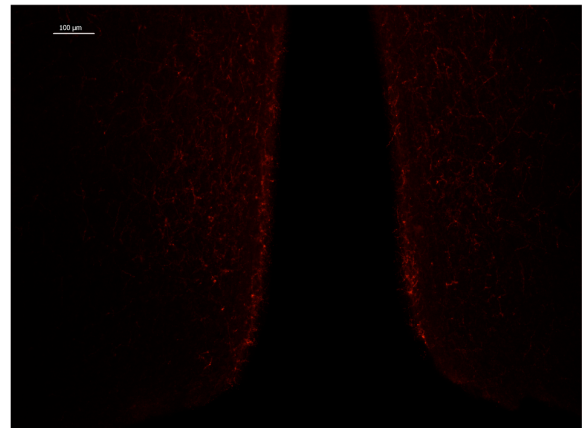

**PRL treated AVPV**

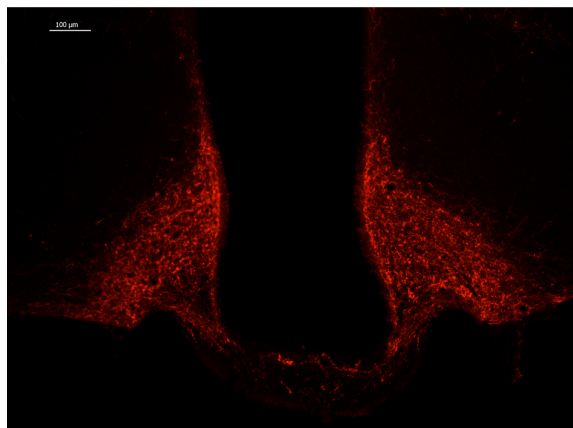

**Control ARC**

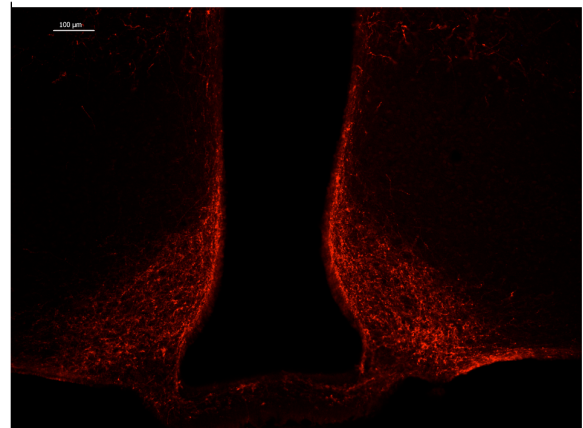

**PRL treated ARC**

**Suppl. Figure 3: NKB immunostaining in control and PRL mice.** NKB neurons staining in ARC and AVPV sections from control and PRL-treated mice (PRL) (Scale bar, 100µm).

The NKB immunoreactivity looks similar in both the AVPV and the ARC.

### **Methods:**

Sections (40 µm thickness) were permeabilized in PBS-Tween-20 (0.1%), followed by 10 min of heat-induced epitope retrieval in a microwave using 10 mM citrate buffer (pH6). Sections were blocked for 45 min at RT using (3% normal donkey serum in PBS with 0.4% Triton X-100). Sections were then incubated overnight at 4°C in blocking solution with a highly specific mouse neurokinin B antibody that was raised in rabbits (1:850, NB300-201, Novus Biologicals, Cambridge, UK). Immunoreactive sites were visualized using a donkey anti-rabbit IgG Alexa Fluor 555 (1:400, A31572, Invitrogen, USA) and a Cy3 filter set. The same microscope exposure settings were used to image each section.

# Supplemental Table 1

**Table 1**

Primer Sequences of Genes Analyzed in quantitative RT-PCR

| Name         | Accession number | Amplicon (bp) | Sense primer          | Antisense primer       |
|--------------|------------------|---------------|-----------------------|------------------------|
| <i>18S</i>   | NR_003278.3      | 66            | CCCTGCCCTTTGTACACACC  | CGATCCGAGGGCCTCACTA    |
| <i>Kiss1</i> | NM_178260.3      | 116           | GCTGCTGCTTCTCCTCTGTGT | GATTCCTTTTCCCAGGCATTAA |
| <i>fsh-β</i> | NM_008045.2      | 103           | GGCTACTGCTACACTAGGGA  | GCAATCTTACGGTCTCGTAT   |
| <i>gnrh</i>  | NM_008145.2      | 193           | AGCACTGGTCCTATGGGTTG  | CCTGGCTTCCTCTTCAATCA   |
| <i>lh- β</i> | NM_008497.2      | 131           | CCTAGCATGGTCCGAGTACT  | AAGGAGACTATGGGGTCTACA  |
| <i>nkb</i>   | NM_001199971.1   | 122           | CTGTGTGGGATGTAATGGAG  | TGGATAGCTGACAGGATCAG   |

The abbreviations of the genes, their GENBANK accession number and 5'- to 3'- nucleotide sequences of the sense and antisense primers are presented.
